1 **Beyond a single patch: local and regional processes explain diversity patterns in a seagrass**  
2 **epifaunal metacommunity**

3  
4 Keila A Stark<sup>1\*</sup>, Patrick L Thompson<sup>1</sup>, Jennifer Yakimishyn<sup>2</sup>, Lynn Lee<sup>3</sup>, Emily M Adamczyk<sup>1</sup>,  
5 Margot Hessing-Lewis<sup>4</sup>, Mary I O'Connor<sup>1</sup>

6  
7  
8 1. Biodiversity Research Centre and Department of Zoology  
9 University of British Columbia  
10 Vancouver, BC, Canada

11  
12 2. Pacific Rim National Park Reserve  
13 P.O. Box 280  
14 Ucluelet, BC, Canada

15  
16 3. Gwaii Haanas National Park Reserve, National Marine Conservation Area Reserve, and  
17 Haida Heritage Site  
18 60 Second Beach Road  
19 Skidegate, BC, Canada

20  
21 4. Hakai Institute  
22 PO Box 309  
23 Heriot Bay, BC, Canada

24  
25  
26 **\*Corresponding author:** [keilastark@zoology.ubc.ca](mailto:keilastark@zoology.ubc.ca)

27  
28  
29 **Abstract:** 251

30 **Main text:** 5000

31 **Number of references:** 68

32 **Number of figures:** 3

33  
34  
35 **Data accessibility:** Data will be made permanently available on Dryad should the manuscript be  
36 accepted. All data and code for the analysis can be currently found at  
37 <https://github.com/keilast/HMS-Seagrass>.

38  
39 **Competing interests:** We have no competing interests.

40  
41 **Acknowledgements**

42 KAS and MIO conceived of the study. JY provided samples from IN, DK, and EB. LL provided  
43 samples from RA and HL. EMA and MHL provided samples from TN, TB, CI, and CS. KAS

44 collected and processed samples, analyzed data, and wrote the first manuscript draft. PLT  
45 provided recommendations for the analysis. KAS, PLT, and MIO contributed to writing the  
46 manuscript. This research was financially supported by a UBC Zoology SURE Grant, and  
47 NSERC Discovery Grants, Canadian Foundation for Innovation (CFI), and is sponsored by the  
48 NSERC Canadian Healthy Oceans Network and its Partners: Department of Fisheries and  
49 Oceans Canada and INREST (representing the Port of Sept-Îles and City of Sept-Îles). PLT is  
50 supported by NSERC and Killam postdoctoral fellowships. We are grateful to the Tula  
51 Foundation for providing logistical support and facilities during Calvert Island field collections.  
52 Special thanks go to Michelle Paleczny and Gulf Islands National Park Reserve for boat and  
53 laboratory space, and staff, students, and volunteers from Pacific Rim National Park Reserve for  
54 their assistance collecting eelgrass. We thank Minako Ito, Ariane Comeau, Rob Underhill, Abbie  
55 Sherwood, Giordano Bua for assistance with samples and Coreen Forbes, Matt Whalen, and  
56 anonymous reviewers for feedback on the manuscript.

57

## 58 **Abstract**

59 Ecological communities are jointly structured by dispersal, density-independent responses to  
60 environmental conditions and density-dependent biotic interactions. Metacommunity ecology  
61 provides a framework for understanding how these processes combine to determine community  
62 composition among local sites that are regionally connected through dispersal. In 17 temperate  
63 seagrass meadows along the British Columbia coast, we tested the hypothesis that eelgrass  
64 (*Zostera marina* L.) epifaunal invertebrate assemblages are influenced by local environmental  
65 conditions, but that high dispersal rates at larger spatial scales dampen effects of environmental  
66 differences. We used hierarchical joint species distribution modelling to understand the

67 contribution of environmental conditions, spatial distance between meadows, and species co-  
68 occurrences to epifaunal invertebrate abundance and distribution across the region. We found  
69 that patterns of taxonomic compositional similarity among meadows were inconsistent with  
70 dispersal limitation and meadows in the same region were often no more similar to each other  
71 than meadows over 1000 km away. Abiotic environmental conditions (temperature, dissolved  
72 oxygen) explained a small fraction of variation in taxonomic abundances patterns across the  
73 region. We found novel co-occurrence patterns among taxa that could not be explained by shared  
74 responses to environmental gradients, suggesting the possibility that interspecific interactions  
75 influence seagrass invertebrate abundance and distribution. Our results add to mounting evidence  
76 that suggests that the biodiversity and ecosystem functions provided by seagrass meadows reflect  
77 ecological processes occurring both within meadows and across seascapes, and suggest that  
78 management of eelgrass habitat for biodiversity may be most effective when both local and  
79 regional processes are considered.

80

81 **Key words:** Hierarchical Modelling of Species Communities, priority effects, dispersal, niche  
82 filtering, British Columbia, *Zostera marina*

83

## 84 **Introduction**

85 Understanding how local environmental conditions, regional connectivity by dispersal and  
86 biotic interactions jointly structure the composition of communities is a central challenge in  
87 ecology (Ricklefs and Schluter 2003, Vellend 2010, Leibold and Chase 2017). Metacommunity  
88 ecology (Leibold et al. 2004, Leibold and Chase 2017, Thompson et al. 2020) offers a  
89 framework for understanding community assembly processes across spatial scales. In recent

90 years, applications of the metacommunity framework have emphasized the underlying processes  
91 that give rise to abundance and diversity patterns (Brown et al. 2017, Leibold and Chase 2018,  
92 Thompson et al 2020). Thompson et al. (2020) framed the metacommunity concept based on  
93 three fundamental processes that together govern the dynamics of populations and communities:  
94 1) Density-independent responses to environmental conditions, 2) Density-dependent biotic  
95 interactions (ie. inter and intra-specific competition, predation or facilitation influencing  
96 population growth and co-existence), and 3) Dispersal influencing connectivity across a  
97 landscape or seascape. We apply this framework to understand the contribution of these  
98 processes to a seagrass-associated invertebrate metacommunity.

99 Many coastal environments that host high biodiversity occupy spatially structured habitats  
100 (e.g. coral reefs, kelp forests, seagrass meadows), and many marine species have dispersing life  
101 histories that link populations in distinct habitat patches. The importance of interspecific  
102 interactions (Berlow 1999, Sala and Graham 2002), and dispersal-driven population dynamics  
103 (Levin and Paine 1974, Gaines and Roughgarden 1985) in coastal and marine communities has  
104 long been recognized. These combined roles of dispersal, the local environment, and biotic  
105 interactions suggest patterns of marine biodiversity reflect metacommunity processes (Boström  
106 et al. 2006).

107 Seagrasses are foundation species that support high productivity and faunal diversity (Orth et  
108 al. 1984, Duffy et al. 2015). They form meadows separated by deeper water, un-vegetated  
109 seafloor, or other vegetated habitats, and associated fauna disperse among meadows (Boström et  
110 al. 2006, 2011). Diverse invertebrate assemblages including snails, amphipods, isopods, and  
111 polychaete worms live among seagrass leaves, providing food sources for larger invertebrates,  
112 fish, and birds (Best and Stachowicz 2014, Huang et al. 2015). The grazers within this group

113 consume detritus, macroalgae, or the seagrass itself (Valentine and Heck 1999), and many taxa  
114 exert top-down control on epiphytic microalgae that compete with the seagrass for light and  
115 nutrients (Sand-Jensen 1977, Duffy and Stachowicz 2006). Seagrass-associated epifauna exhibit  
116 a range of dispersal modes (fast swimming by isopods; slow crawling by snails; permanent  
117 attachment in bivalves) and reproductive strategies (brooding versus broadcast spawning) which  
118 influence dispersal rates and the distances over which meadows are demographically connected.

119 Seagrass meadows occur in a wide range of temperature, salinity and hydrodynamic  
120 environments, such that meadows may differ in their suitability for various invertebrate taxa  
121 (Yamada et al. 2007, 2014). Evidence for the importance of environmental filtering -- or the  
122 tendency for taxa to exist where local environmental conditions are ideal -- has been reported in  
123 several seagrass-associated fish and invertebrate systems (Baden et al. 2010, Robinson et al.  
124 2011, Iacarella et al. 2018).

125 Though interspecific interactions among seagrass-associated invertebrates are not extensively  
126 documented, there is some evidence of competition and predation influencing community  
127 structure (Nelson 1979, Best and Stachowicz 2014). Predation can reduce abundances of  
128 vulnerable invertebrate taxa, allowing others to increase in abundance (Nelson 1979, Baden et al.  
129 2010, Best and Stachowicz 2014, Amundrud et al. 2015, Huang et al. 2015). Despite some  
130 evidence for competition among epiphytic grazers for shared food sources (Edgar 1990, Bruno  
131 and O'Connor 2005) there is no evidence of competitive dominance to the point of exclusion in  
132 the field (Nelson 1979, Best and Stachowicz 2014).

133 While research in past decades has found evidence for direct and indirect influences of local  
134 characteristics such as habitat complexity (Orth et al. 1984), primary biomass (Cébrían and  
135 Duarte 1998, Gullström et al. 2012), and nutrient availability (Virnstein and Howard 1987) on

136 faunal diversity and abundance, recent studies have focused more on regional scale or multi-  
137 meadow processes such as dispersal (Whippo et al. 2018, Lefcheck et al. 2016, Stier et al. 2019,  
138 Yeager et al. 2019), and have found that the influence of local-scale factors are often overridden  
139 by regional patterns of inter-meadow connectivity (Lefcheck et al. 2016, Stier et al. 2019, Yeager  
140 et al. 2019). This pattern has been attributed to relatively rapid life histories and high inter-  
141 meadow dispersal in seagrass-associated organisms (Lefcheck et al. 2016).

142 We designed this study to better understand the contributions of dispersal, local  
143 environmental conditions, and interspecific interactions with the largest spatially explicit (in  
144 geographic extent) dataset of seagrass metacommunity diversity. Drawing upon metacommunity  
145 theory, we tested the hypotheses that: (H1) Spatial distance *per se* within a region does not  
146 confer community dissimilarity because meadows are well-connected by dispersal, even at larger  
147 spatial scales (*dispersal limitation hypothesis*); (H2) Differences in local-scale environmental  
148 factors such habitat structure, temperature, and salinity drive some differences in invertebrate  
149 presence and abundance owing to differences in environmental niches among taxa, however the  
150 contribution of environmental factors is smaller than the contribution of spatial distance/  
151 dispersal (*environmental filtering hypothesis*); (H3) No clear patterns of spatial co-occurrence  
152 among epifaunal species emerge because high dispersal and environmental responses override  
153 signatures of biotic interactions (predation, competition) that would produce such patterns (*biotic*  
154 *interactions hypothesis*).

155

## 156 **Methods**

### 157 *Study sites*

158 We sampled epifaunal invertebrate diversity in 17 *Zostera marina* (L.) meadows

159 spanning the entire coast of British Columbia (approximately 1000 km distance) from late June  
160 through August of 2017. Within five regions that each contain numerous eelgrass meadows, we  
161 sampled a few meadows for our study (Fig. 1a): Haida Gwaii (two meadows); the central coast  
162 of BC near Calvert Island (four meadows); southern Clayoquot Sound (three meadows); Barkley  
163 Sound on the West coast of Vancouver Island (three meadows); the Southern Gulf Islands (five  
164 meadows). Meadows varied in environmental conditions, such as seagrass shoot size and  
165 density, hydrological regimes, and freshwater outflow influencing salinity.

166

### 167 *Field sampling*

168 We sampled three subtidal meadows with SCUBA in the Barkley Sound (SA, DC, RB)  
169 and Central Coast (TB, TB, CI, CS) regions. All others were sampled by wading or snorkeling  
170 at low tide. We conducted collections within a six-week period of peak seagrass growth. We  
171 used 0.25 m x 0.25 m quadrats to collect all above-ground eelgrass, epifaunal invertebrates,  
172 eelgrass detritus, and macroalgae in each sample, following Whalen et al. (2013). Six quadrats  
173 were arranged in a 15 m x 30 m array (Appendix 1: Fig. S1) in the middle of the meadow to  
174 avoid edge effects. We uprooted eelgrass shoots at the first node, leaving rhizomes to avoid  
175 sampling infauna that live in the sediments, removed all other above-ground biomass (detritus,  
176 macroalgae, associated epifauna) within each quadrat by hand, and immediately placed all the  
177 contents into a 300  $\mu$ m mesh or plastic Ziploc bag for transport to the lab.

178

### 179 *Environmental data*

180 We acquired water quality data from regional data sources. The abiotic water quality data  
181 were annual means pulled from Bio-ORACLE (Assis et al. 2018), including oxygen, nitrates,

182 phosphates, silicates, salinity, maximum current velocity and sea surface temperature. Bio-  
183 ORACLE is a database of marine environmental layers gathered from several satellite and in-situ  
184 sources at a spatial resolution of 0.08°, and has been shown to accurately model distributions of  
185 shallow-water invertebrate species (Tyberghein et al. 2012, Assis et al. 2018). Sea surface  
186 temperature layers were taken from the Aqua-MODIS satellite, and values for nitrates, dissolved  
187 oxygen, and salinity were interpolated from in-situ measurements reported in the World Ocean  
188 Database (Tyberghein et al. 2012). All meadows were situated in distinct spatial cells, and thus  
189 had distinct values for the aforementioned variables. We excluded phosphate and silicate  
190 concentrations from our final analysis, as they strongly covaried with nitrates.

191 In each quadrat sample, we measured four biotic attributes summarizing habitat structure  
192 and food availability: eelgrass leaf area index (LAI), and eelgrass, eelgrass detritus, and algal dry  
193 mass. To quantify LAI, we measured leaf length, width, and blade number in five haphazardly-  
194 chosen shoots from each quadrat, and multiplied the average blade area per shoot by the quadrat-  
195 level shoot density. We dried eelgrass, detritus, and macroalgae in a desiccator oven (60° C for  
196 48 hours) to measure ash-free dry mass.

197

### 198 *Invertebrate identification*

199 Immediately after collection, we rinsed eelgrass shoots with fresh water, passing the  
200 water through a 500 µm sieve to remove epifaunal invertebrates. Invertebrates were preserved in  
201 95% EtOH for identification with light microscopy (10x magnification). We identified  
202 invertebrates to the lowest taxonomic level possible using keys in the Light and Smith manual  
203 (Carlton 2007) and Kozloff (1996). In many cases, the lowest taxonomic resolution possible was  
204 family or genus, therefore our biodiversity survey likely underestimates full species diversity.



205

206 *Analysis*

207 All statistical analyses were conducted in R (version 3.6.0; R Development Core Team  
208 2019). We followed the Hierarchical Modelling of Species Communities (HMSC) framework  
209 (Ovaskainen et al. 2017) using the ‘Hmsc-R’ package (Tikhonov et al. 2019) to fit a hierarchical  
210 joint species distribution model (JDSM) with Bayesian inference. The framework uses traditional  
211 single-species distribution modelling by estimating species responses (presence or abundance) to  
212 environmental covariates across samples, but does so for all species simultaneously. It can use  
213 residual variation in occurrences to infer species co-occurrence patterns that do not result from  
214 shared responses to environmental covariates in the model (Ovaskainen et al. 2017). HMSC can  
215 also account for spatially hierarchical sampling structures. In these ways, the HMSC framework  
216 overcomes statistical limitations of previous methods used in metacommunity studies (Gilbert and  
217 Bennett 2010, Tuomisto et al. 2012, Brown et al. 2017).

218 Each individual species distribution model within the JDSM is a generalized linear model  
219 that describes the abundance of species  $j$  (where  $j = 1 \dots n$ ), where  $y_{ij}$  is the abundance of species  $j$   
220 in sample  $i$ ,  $D$  is the statistical distribution of the abundance data (Poisson distribution in this study),  
221  $L_{ij}$  is the linear predictor to link species’ presence with environmental covariates, and  $\sigma_j$  is a  
222 variance term for the abundance of species  $j$ :

223 
$$y_{ij}^D \sim D(L_{ij}, \sigma_j^2).$$

224 The linear predictor  $L_{ij}$  is described by fixed ( $F$ ) and random ( $R$ ) effect terms:

226

227 
$$L_{ij} = L_{ij}^F + L_{ij}^R,$$

228

229 The fixed effect term  $L_{ij}^F$  is modelled as a regression:

230

$$L_{ij}^F = c_{jk}x_{ik}$$

231

232 where  $x_{ik}$  represents the measured value for environmental covariate  $k$  for a given sample  $i$  (e.g.,  
233 biomass in quadrat  $i$ ), and parameter  $\beta$  represents the relationship between environmental  
234 covariate  $k$ , and the abundance of species  $j$ .

235 The random effect term  $L_{ij}^R$ , captures the variation in species abundances that cannot be explained  
236 by the measured covariates. It is further denoted as:

237

$$L_{ij}^R = \varepsilon_{ij}^Q + \varepsilon_{ij}^S + \varepsilon_{ij}^R + \varepsilon_{ij}^D$$

238 where the terms describe three random effects associated with our spatially nested sampling  
239 scheme ( $\varepsilon_{ij}^Q$ ,  $\varepsilon_{ij}^S$ ,  $\varepsilon_{ij}^R$  for Quadrat (sample), Site (meadow), and Region), as well as a fourth spatially  
240 explicit random effect (spatial autocorrelation in species abundances). The spatially explicit  
241 random effect  $\varepsilon_{ij}^D$  was calculated with latent factor analysis that takes into account spatial distance  
242 between all pairwise combinations of samples (see Ovaskainen et al. 2016a for details).

243 The three non-spatial random effect terms are assumed to have multivariate normal  
244 distributions  $\varepsilon_{ij}^Q \sim N(0, \Omega^Q)$ ,  $\varepsilon_{ij}^S \sim N(0, \Omega^S)$ ,  $\varepsilon_{ij}^R \sim N(0, \Omega^R)$ . Variance terms  $\Omega^Q$ ,  $\Omega^S$ ,  $\Omega^R$ , are  
245 variance-covariance matrices (square matrices containing all taxa in the model), where the  
246 diagonal elements give species-specific residual variance in occurrences among samples, and the  
247 off-diagonal elements give residual co-variances between species pairs. The term “residual” refers  
248 to the fact that it is the variance unexplained by environmental covariates in the fixed effects  
249 predictor described above. These variance-covariance matrices ( $\Omega^Q$ ,  $\Omega^S$ ,  $\Omega^R$ , and  $\Omega^D$ ) are  
250 parameters estimated using a latent variable approach described in Ovaskainen et al. (2016b). They

251 were used to represent co-occurrence matrix  $R$ , where  $j_1$  and  $j_2$  refer to two species within the  
252 model, and  $R_{j_1j_2} = \Omega_{j_1j_1} / \sqrt{\Omega_{j_1j_1}\Omega_{j_2j_2}}$ .  $R$  describes the extent to which a given species pair co-  
253 occurs more positively or negatively than by chance, after controlling for possible shared responses  
254 to the same environmental covariates.

255 We estimated parameters with Markov chain Monte Carlo. Markov chains were run to  
256 200 000 iterations, a burn-in length of 1000 iterations, and was thinned to retain every 10<sup>th</sup>  
257 sample of the posterior distributions. We confirmed that Markov chains were well-mixed by  
258 visually inspecting trace plots. Estimates of parameter  $\beta$  (environmental responses across taxa)  
259 and  $\Omega$  (variance-covariance matrices used to visualize species co-occurrence patterns  
260 independent of the environment) were extracted as 95% credible intervals. We evaluated the  
261 model fit ( $R^2$  and Root-Mean-Square Error or RMSE) using 4-fold cross-validation.

262 To test our three hypotheses, we visualized different aspects of the parametrized JDSM.  
263 To test for dispersal limitation (H1), we looked for increased pairwise community dissimilarity  
264 among samples with increased pairwise spatial distance. We predicted species abundances in  
265 every sample using our trained model, then calculated pairwise Bray-Curtis dissimilarity index  
266 (Bray and Curtis 1957) on these predicted abundances. We then conducted log-linear regression  
267 of predicted pairwise dissimilarity against pairwise spatial distance (km) on a logarithmic scale.  
268 Increased community dissimilarity could reflect dispersal limitation due to prohibitively far  
269 dispersal distances, *or* due to increasing differences in environmental conditions with increasing  
270 spatial scale. To distinguish between these possibilities, we compared a regression of predicted  
271 dissimilarity based on the full JDSM (including environmental covariates) with the predicted  
272 dissimilarity calculated from the same trained model, but with no effect of the environment (all  
273 environmental covariates were set to their mean values).

274 To test the environmental filtering hypothesis (H2), we analyzed  $\beta$  for each combination  
275 of species and environmental covariate to determine whether they had a positive or negative  
276 relationship. We also partitioned the variance in abundance explained by environmental  
277 covariates, spatial autocorrelation, and sampling design random effects.

278 To test the biotic interactions hypothesis (H3), we represented co-occurrence matrix R as  
279 a correlation plot for each random effect level, demonstrating the extent to which species pairs  
280 co-occurred more negatively or positively than predicted by their modelled correlation with  
281 environmental covariates at each spatial scale (Ovaskainen et al. 2017, Aivelo and Norberg  
282 2018).

283

## 284 **Results**

### 285 *Taxonomic abundance and distribution patterns*

286 We identified 52 282 individuals representing at least 50 taxa across the region  
287 (Appendix 2: Table 2). Of these, 3% of individuals were bivalves, 12% were gastropods (snails  
288 and limpets), 14% were copepods, 41% were polychaetes (most of which were calcifying  
289 polychaetes *Spirorbis* sp.), 13% were gammarid amphipods, 6% were caprellid amphipods, and  
290 the remaining 11% included other crustaceans (isopods, tanaids, cumaceans, crabs, shrimp).  
291 These taxa span several phyla, diet types (herbivores, detritivores, suspension feeders), and  
292 dispersal strategies (brooding, broadcast spawning). Mean meadow-level taxonomic richness  
293 was 20 taxa per 0.0625 m<sup>2</sup> of seagrass area.

294 Several taxa were present at all 17 meadows: harpacticoid copepods *Porcellidium* sp.  
295 (4% of all individuals across the entire region), snails *Lacuna* spp. (7%), and tanaids *Leptochelia*  
296 sp. (10%). We found genera *Mytilus* sp. (mussel) and *Nereis* sp. (polychaete worm) in all

297 meadows, however we were not confident the same species were present at each meadow. Ten  
298 taxa were present in every region, but not necessarily every meadow: isopod *Pentidotea*  
299 *resecata*, gammarid amphipods *Monocorophium insidiosum*, *Ampithoe valida*, *Pontogeneia*  
300 *rostrata*, *Ampithoe dalli*, *Aoroides* spp., snails *Amphissa columbiana* and *Alia carinata*, and  
301 limpet *Lottia pelta*.

302 We excluded rare species (those found in fewer than 5% of samples, or fewer than 5 out  
303 of 102 quadrats) from our JDSM, leaving 33 taxa in our modelling analysis (Appendix 1: Table  
304 S2). This was necessary to avoid statistically over-inflating the importance of model covariates.

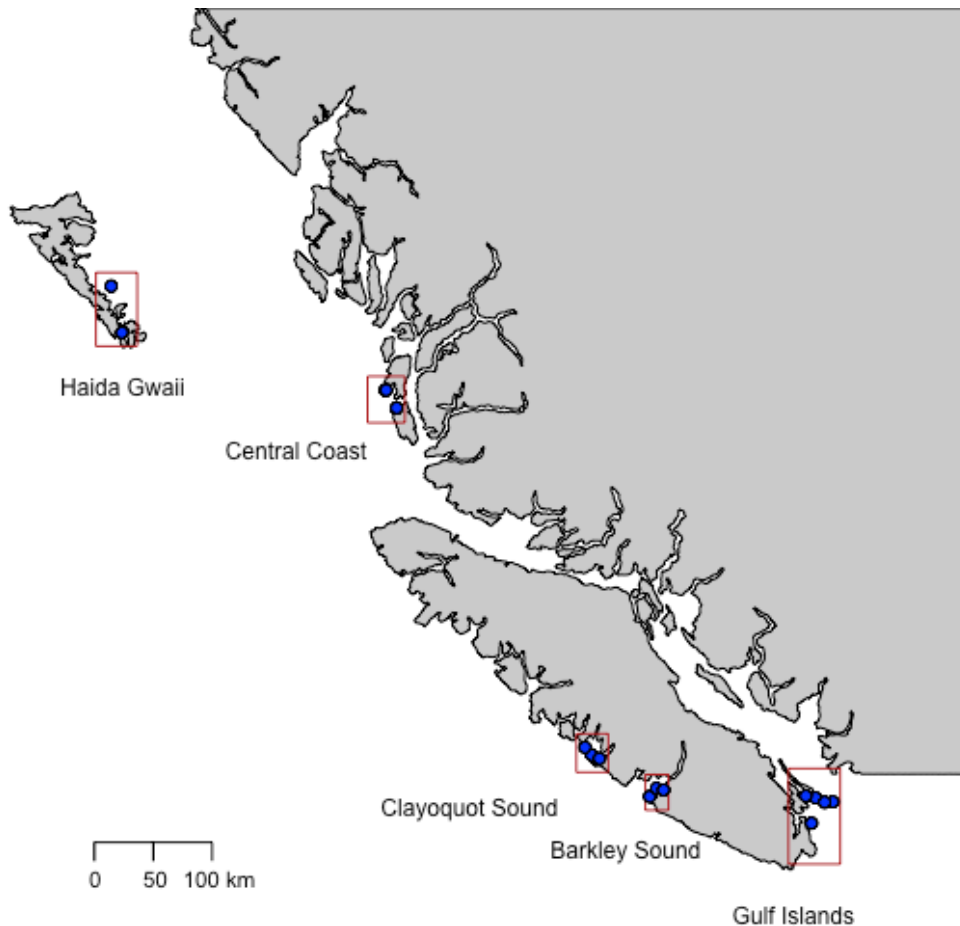

305

306 **Fig. 1A** Map of coastal British Columbia showing eelgrass meadow sites in Haida Gwaii (HL, RA), Clayoquot Sound (DK, EB, IN), Barkley  
307 sound (SA, DC, RB), near Calvert island in the central coast (TB, TN, CS, CI), and the southern gulf islands (GB, JB, CB, LH, SS).

308  
309  
310  
311  
312  
313  
314  
315  
316  
317  
318  
319  
320  
321

*Spatial connectivity via dispersal driving community similarity*

The highest Bray-Curtis dissimilarity value was 0.99 for a pair of sites spaced 787 km apart (HL in Haida Gwaii and SA in Clayoquot Sound). The two communities at the highest pairwise distance (997 km, RA in Haida Gwaii and SS in the Gulf Islands) had a dissimilarity index of 0.8. The lowest dissimilarity index value was 0.59 at a pairwise spatial distance of 0.6 km (LH and SS in the Gulf Islands). A log-linear regression of Bray-Curtis dissimilarity calculated from predicted abundances using the JDSM showed that community dissimilarity increased with increased spatial distance (Fig. 1b,  $y = 0.75 + 0.023\log(x)$ ,  $n = 272$ ,  $R^2 = 0.16$ ). The maximum and minimum pairwise dissimilarity values were reduced when the effect of the environment was removed ( $y = 0.74 + 0.021\log(x)$ ,  $n = 272$ ,  $R^2 = 0.07$ ), suggesting environmental variables drive some dissimilarity in species composition with increased spatial distance.

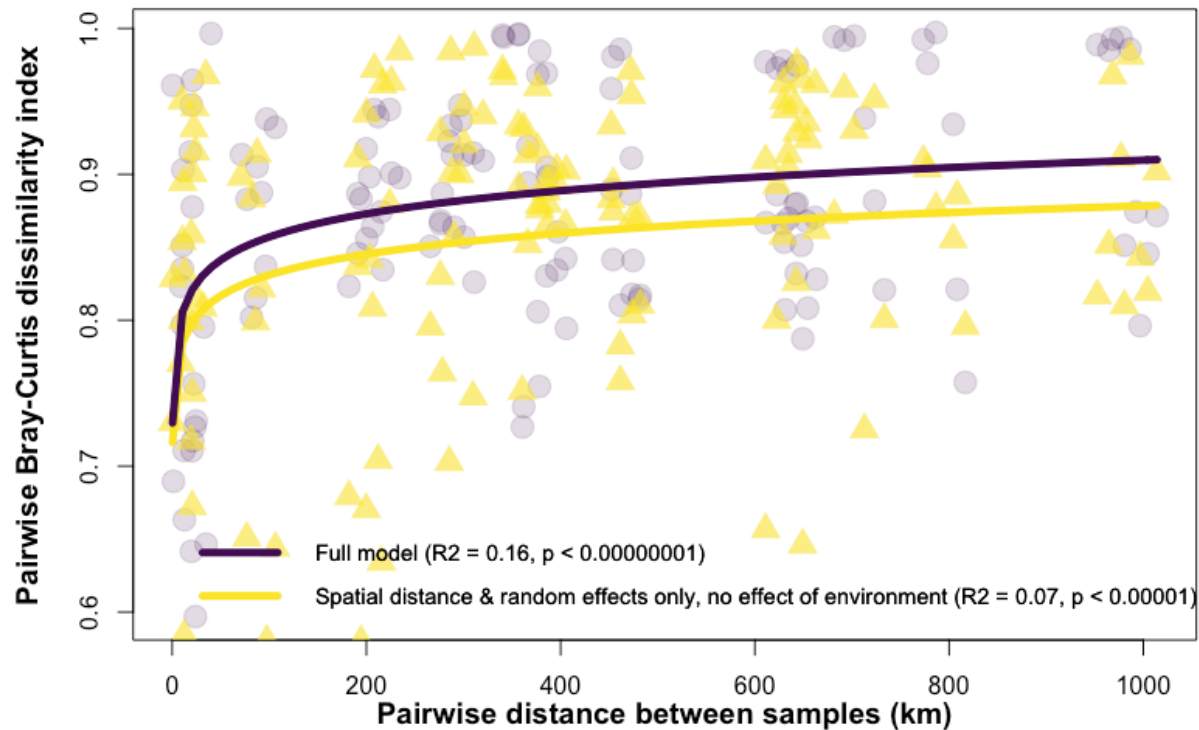

322

323 **Figure 1b.** Bray-Curtis pairwise community dissimilarity index as a function of spatial distance (Euclidean) between every pairwise combination  
324 of meadows in our study. The purple points and line show pairwise dissimilarity predicted by the full joint species distribution model using the  
325 original environmental and spatial data. The yellow points and line show pairwise dissimilarity predicted by the same trained model, but the  
326 effect of all environmental variables has been removed (set to their mean values). The yellow points and line show calculated pairwise  
327 dissimilarity based on the raw abundance data.

328

329

### 330 *Environmental conditions*

331 The assessment of model fit and variance partitioning analysis both showed that the importance  
332 of environmental covariates differed among taxa, and that overall the environment explained  
333 relatively a low proportion of variation in species abundances across the region (Fig 2a). While  
334 the mean R<sup>2</sup> across individual species distribution models was 0.27, individual R<sup>2</sup> values varied  
335 (0 to 0.68, Appendix 1: Table A2) indicating variability in model fit.

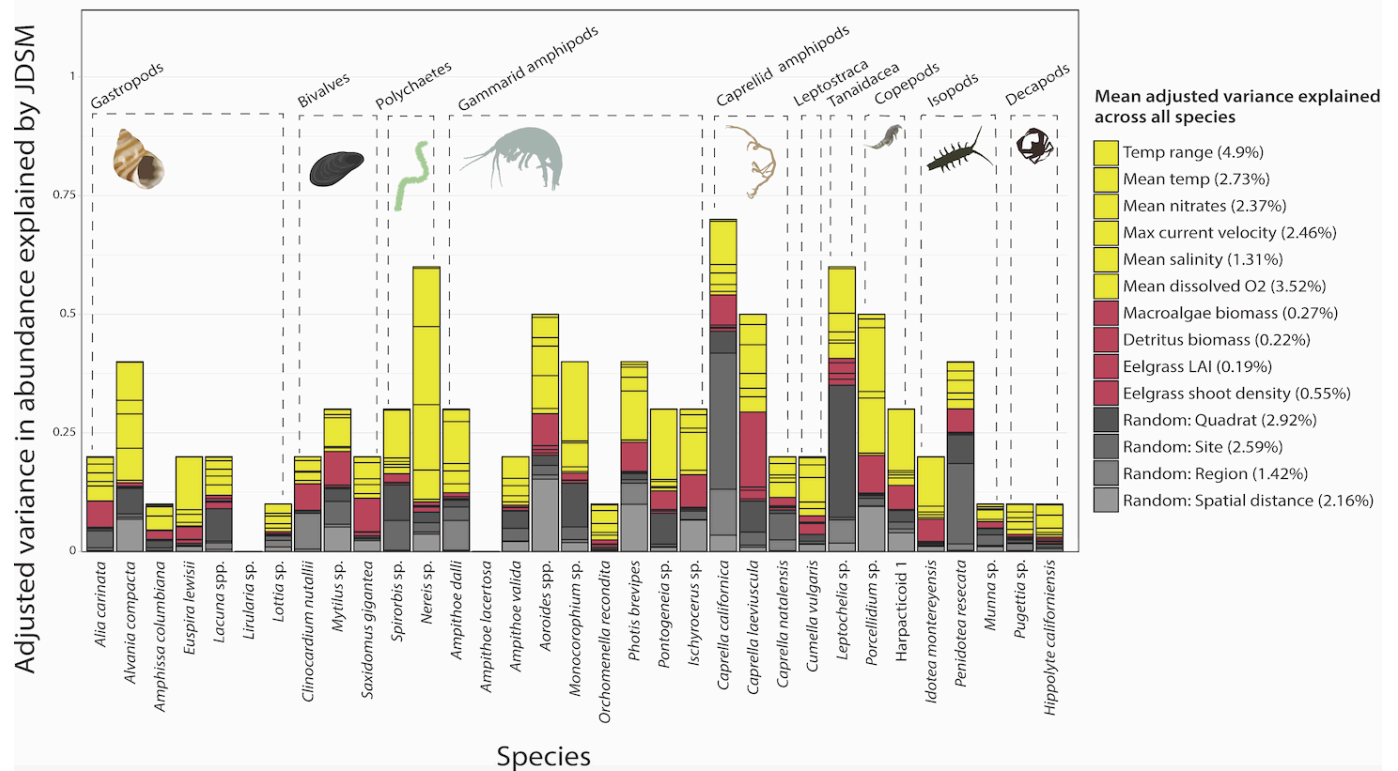

336

337 **Figure 2a.** Variation partitioning of fixed and random effects within the joint species distribution model. Variances explained  
 338 have been adjusted to reflect the model fit (Multiplied by Pseudo R<sup>2</sup>). An unadjusted version of the variance partitioning analysis  
 339 can be found in Appendix 1, Fig. S3 of the Supplementary Information. Dashed lines indicate broad invertebrate taxonomic  
 340 groupings. Grey cells represent the contribution of random effects associated with the sampling design. Yellow cells represent  
 341 abiotic water quality covariates. Pink cells represent biotic covariates (food availability, habitat structure). The percentages next  
 342 to the legend labels indicate mean variation explained by that covariate/ random effect across all species distribution models.

343 Overall, abiotic water quality variables explained more variation than biotic variables  
 344 (Fig. 2a). Mean and range of sea surface temperatures and dissolved oxygen explaining the  
 345 largest proportions of variation on average. Herbivore food availability (seagrass, algae biomass)  
 346 and habitat structure (seagrass shoot density and LAI) had lower influence on abundance (pink  
 347 bars, Fig. 2a). The importance of some environmental covariates differed markedly among taxa;  
 348 for example, nitrate levels explained approximately 27% of variance in the abundance of  
 349 gastropod *Alvania compacta* across meadows, but only 5% of variance in gastropod *Alia*  
 350 *carinata* (Fig 2a). The mean variance in taxon abundance explained by spatial autocorrelation



351 was 2.2% (pale gray bars, Fig. 2a), and other hierarchical random effects associated with the  
352 sampling design explained 2.92% (quadrat-level), 2.59 (meadow or site-level), and 1.42%  
353 (region-level) of variation.

354         The strength and directionality of responses to environmental variables also differed  
355 among taxa, based on inspection of the  $\beta$  parameters that estimate the relationships between  
356 environmental covariates and species abundances (Fig. 2b). None of the taxa in our study  
357 showed statistically supported responses ( $\beta$  within 95% credible interval) to all environmental  
358 variables. The few that showed a significant response to eelgrass LAI responded positively  
359 (higher LAI meant higher abundances). Thirteen taxa responded negatively to higher temperature  
360 ranges, and two responded positively (Fig. 2b). The majority of taxa (22 out of 33) had  
361 significant responses to dissolved oxygen levels. Of these, 8 responded negatively (high  
362 dissolved O<sub>2</sub> yields lower abundances), and 14 responded positively (high dissolved O<sub>2</sub> yields  
363 lower abundances).

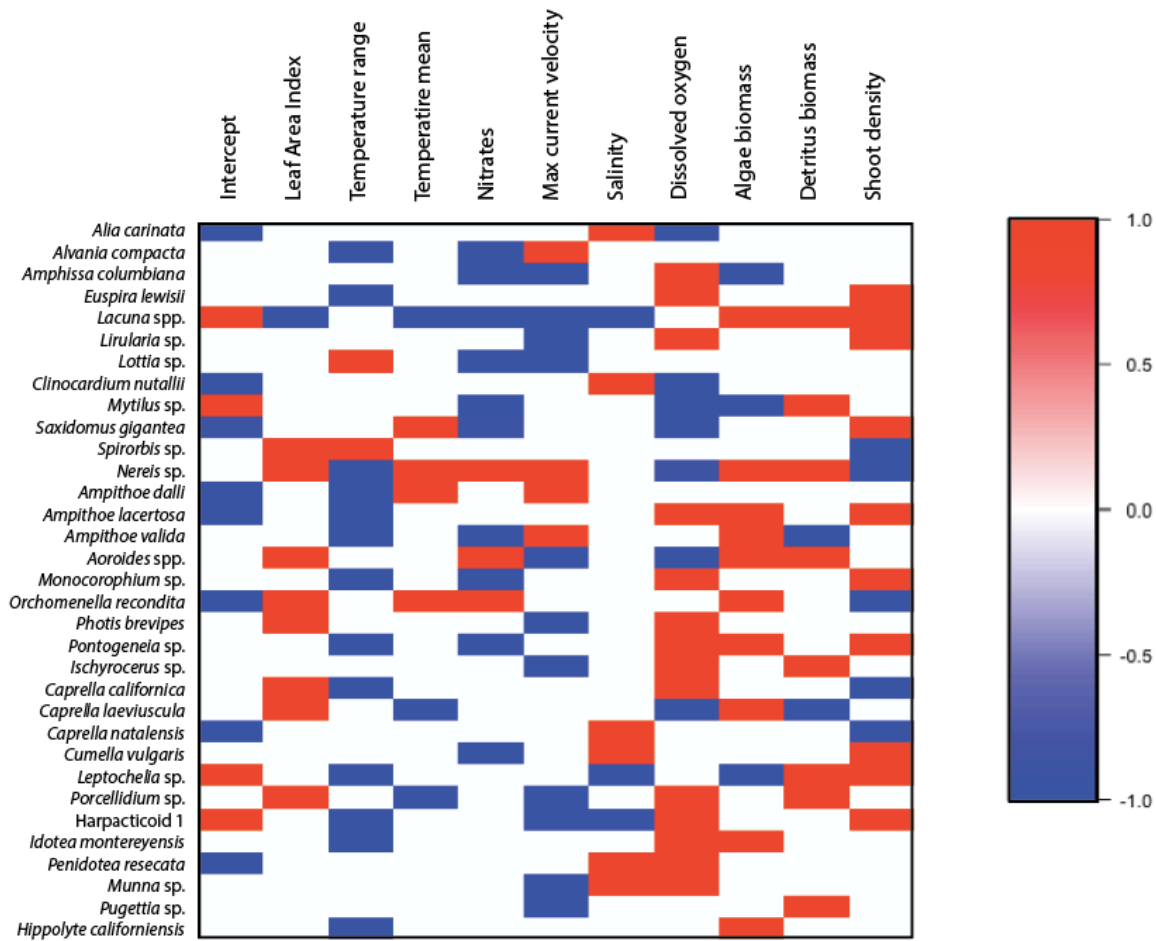

364

365 **Figure 2b.** Heat plot summarizing beta ( $\beta$ ) parameters, or responses to all environmental covariates in the joint species distribution  
 366 model. Coloured cells indicate that the response is statistically supported ( $\beta$  falls within 95% credible interval). Red cells indicate  
 367 positive responses to a given environmental covariate (higher abundance correspond with higher values of the environmental  
 368 covariate), whereas blue cells indicate negative responses (lower abundance with higher values of the environmental covariate).

369

370

### 371 *Co-occurrence patterns*

372 Co-occurrence patterns were less strong at the between-quadrat and between-region  
 373 spatial scales (Fig 3a, 3c). In comparisons among quadrats, we observed more positive species  
 374 co-occurrences than negative co-occurrences (Fig. 3a). In comparisons among meadows, we  
 375 identified, *post hoc*, two main species co-occurrence groupings (Fig. 3b). Members of the first

376 group (hereafter referred to as *Leptochelia* group) included *Leptochelia* sp. (tanaid), *Photis*  
377 *brevipes* (gammaridean amphipod), *Amphissa columbiana* (snail), *Spirorbis* sp. (calcifying  
378 polychaete), *Nereis* sp. (polychaete worm), *Caprella laeviuscula* and *Caprella natalensis*  
379 (caprellid amphipods) (Fig. 3b). These taxa positively co-occurred more often than expected by  
380 chance or by environmental filtering. They negatively co-occurred with members of the second  
381 group, which included a harpacticoid copepod species, *Mytilus* sp. (mussel), *Porcellidium* sp.  
382 (copepod), *Ischyrocerus* sp. (gammarid amphipod), and *Penidotea resecata* (isopod) (hereafter  
383 referred to as harpacticoid group). *Alvania compacta* and *Lirularia* sp. (snails) positively co-  
384 occurred with each other but did not strongly co-occur with members of the two main groups.  
385 Remaining taxon pairs did not exhibit strong positive or negative co-occurrence patterns.

386         The two co-occurrence groups were represented at all meadows, suggesting that members  
387 from these groups can be simultaneously present (Fig. 3d). However, their abundances tended to  
388 negatively co-vary; at meadows JB, HL, CB, RA, EB, DC, and DU, members of the *Leptochelia*  
389 group were most abundant, whereas Harpacticoid group members were most abundant at SS, SA,  
390 LH, GB and RB. Meadow HL was an outlier, as it was strongly dominated by *Spirorbis* sp. The  
391 emergent species groupings identified in Fig. 3b do not clearly correspond with geographical  
392 structure because the cluster analysis did not group meadows by region membership (black  
393 symbols, Fig. 3d).  
394

395  
396  
397  
398  
399  
400  
401  
402  
403  
404  
405  
406  
407  
408

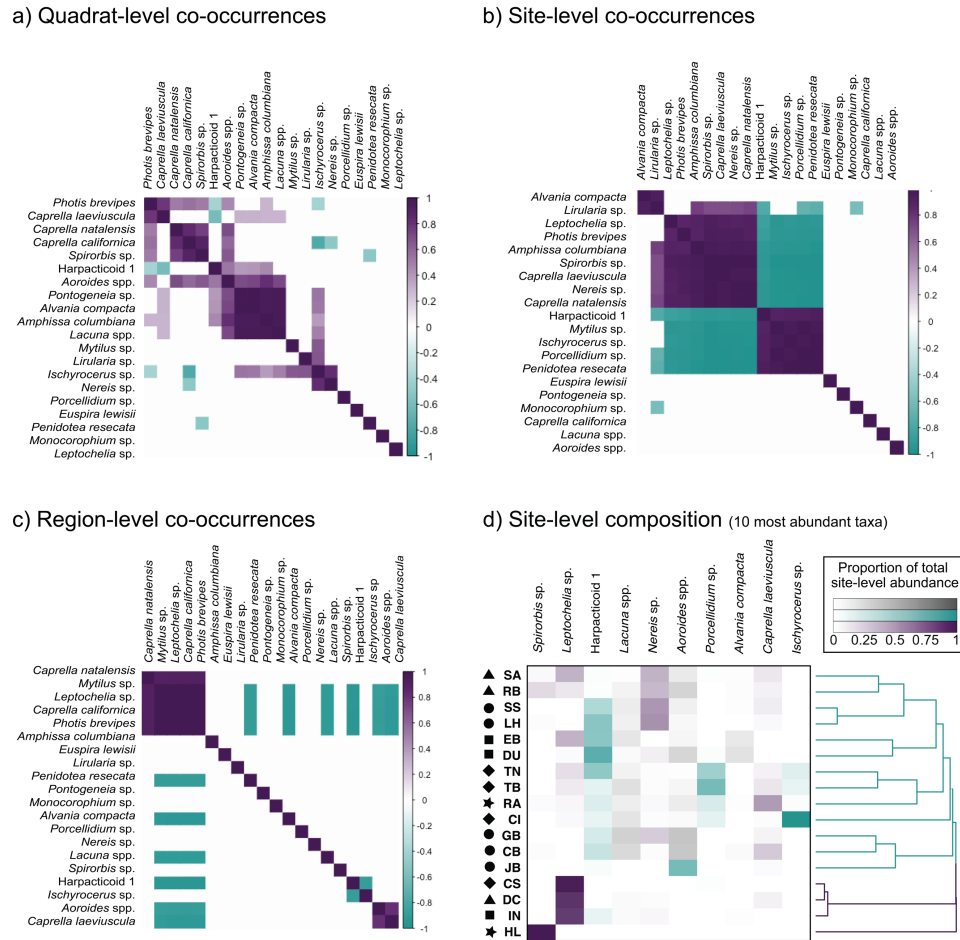

**Figure 3. a-c)** Correlation plots showing modelled a) quadrat-level, b) site-level, and c) region-level pairwise co-occurrences after removing the effect of shared responses to the environmental covariates in our model. Only the 20 most abundant species (according to total abundance across the metacommunity or study region) are represented. Purple cells represent positively co-occurring species pairs, and turquoise cells represent negatively co-occurring species pairs. Species names are ordered according to the output of hierarchical clustering with Ward’s criterion on pairwise co-occurrence values. **d)** Heatmap and cluster dendrogram depicting species relative abundance and compositional similarity across sites. Species are ordered by decreasing abundance from left to right. Cell colours correspond to the two main site-level co-occurrence groupings shown in Fig. 3b: purple or “*Leptochelia*” group, and blue or “Harpacticoid” group. Cell shade strength indicates proportional abundance at a given site (darker means higher relative abundance). The black symbols to the left of the site abbreviations indicate region membership; stars indicate Haida Gwaii sites, diamonds indicate Central Coast sites, triangles indicate Barkley Sound sites, squares indicate Clayoquot Sound sites, and triangles indicate Southern Gulf Islands sites.

## 418 **Discussion**

419           With a biodiversity survey of 17 seagrass meadows across an approximately 1000km  
420 spatial extent, we fitted a joint species distribution model to test hypotheses about the  
421 contributions of dispersal, environmental filtering, and species interactions to epifaunal  
422 invertebrate abundance and distribution. We also documented at least two previously  
423 unrecognized species' associations in the region. This study is the largest (in geographical  
424 extent) spatially explicit seagrass-based metacommunity study to our knowledge. We found little  
425 support for complete dispersal limitation even across over 1000 km of coastline, some support  
426 for the importance of environmental niche filtering, and co-occurrence patterns that might have  
427 arisen from interspecific interactions. Overall, these results suggest that seagrass-associated  
428 biodiversity patterns reflect ecological processes spanning local (meadow-scale) to regional  
429 scales, and provide additional support for recent findings that eelgrass-associated diversity  
430 reflects regional-scale ecological processes in addition to local scale processes (Lefcheck et al.  
431 2016, Whippo et al. 2018, Stier et al. 2019, Yeager et al. 2019).

432

433 *Dispersal limitation is unlikely at this regional spatial scale*

434           Our findings that: 1) Many species were present in all regions or all meadows; 2) The  
435 effect of spatial distance alone did not explain decay in community similarity (Fig. 1b); 3) There  
436 was a low contribution of spatial autocorrelation to variance in species abundance (Fig. 2a); and  
437 4) Hierarchical cluster analysis did not group meadows according to spatial regions (black  
438 symbols in Fig. 3d), all suggest that distance between meadows likely does not confer dispersal  
439 limitation preventing populations at distant sites from exchanging individuals. It is however  
440 likely that meadows that are physically near each other likely experience higher rates of

441 exchange in individuals than distant ones, given our observation that dissimilarity increases  
442 logarithmically with increased spatial distance. The six taxa that were present at all meadows and  
443 an additional ten taxa that were present in all regions had representation from across phyla and  
444 life history traits (including rare taxa), suggesting that no single taxonomic group or dispersal  
445 strategy had a consistently larger spatial distribution than others. Many meadows were small (< 1  
446 ha), and epifaunal abundances can vary substantially within meadows from year to year (Nelson  
447 1997, Douglass et al. 2010) such that local extinctions followed by rescue from nearby  
448 populations are likely (Thom et al. 1995). However, the specific pathway that dispersing  
449 organisms travelled to arrive at these meadows remains unknown. We used Euclidean distances  
450 in our analysis, which preserved the rank order of distances between meadows, but actual  
451 distances are likely greater due to oceanographic circulation patterns (Kinlan and Gaines 2003,  
452 Mitarai et al. 2008).

453         It is unclear whether distant meadows share taxa because they: 1) Are linked by direct  
454 dispersal via oceanographic processes (currents); 2) Are indirectly linked by dispersal via  
455 unsampled “stepping-stone” meadows or other habitat types; or 3) Were colonized by  
456 populations of the same species in a historical dispersal event, but have not seen the exchange of  
457 individuals since (Lefcheck et al. 2016). Seagrass-associated epifauna generally disperse  
458 passively between meadows, either through larval transport in currents or by “rafting” on  
459 floating pieces of seagrass or macroalgae. Rafts have been observed dispersing benthic and  
460 epifaunal invertebrates across phyla (echinoderms, peracarids, molluscs, annelids), and facilitate  
461 connectivity between coastal ecosystems across 100s of kilometres (Wichmann et al. 2012).

462         Our inferences are based on an analysis that necessarily emphasized common taxa –  
463 either numerically dominant or present in most meadows, or both. We observed seventeen rare

464 taxa that were found in fewer than 5% of our samples, often at extremely low abundances (1-2  
465 individuals per meadow, or per 6 quadrats) in our survey of over 50 000 individuals. The spatial  
466 extent of their range could be dispersal-limited for reasons other than prohibitively long travel  
467 distances. Populations with low abundances may not disperse in appreciable numbers, and  
468 therefore cannot establish populations as readily as abundant species; this is supported by our  
469 observation of a positive relationship between range size (the number of meadows a species was  
470 observed at) and abundance (Appendix 1: Fig. S4). This highlights a potential bias in studies like  
471 ours against detecting dispersal limitation if it is most severe for rare taxa. Increasing the sample  
472 size might reduce the risk of this type of bias, but would cost a substantial amount of time  
473 associated with invertebrate identification. More efficient biodiversity sampling methods (e.g.  
474 eDNA) could overcome this time cost.

475         Theory predicts that intermediate dispersal ('dispersal sufficiency', Leibold and Chase  
476 2017) allows species to colonize sites where local environmental conditions are optimal for  
477 growth and reproduction, whereas high dispersal ('dispersal surplus') overrides this, allowing  
478 species to persist in habitats that cannot sustain positive population growth without substantial  
479 immigration ('mass effects', Mouquet and Loreau 2013). A subset of species was present at all  
480 meadows, but their abundances varied (Fig 3d); this pattern may suggest weak mass effects,  
481 where dispersal rates are high enough for several taxa to occur at most meadows even if local  
482 conditions are suboptimal, but not so high as to completely overwhelm the signature of  
483 environmental conditions (Schmidha and Wilson 1985, Mouquet and Loreau 2003).  
484 Metacommunity theory predicts that such weak mass effects are likely whenever dispersal rates  
485 are not limiting (Thompson et al. 2017), particularly in organisms that cannot control their own  
486 dispersal (Leibold and Chase 2017) such as seagrass-associated invertebrates. This may explain

487 the poor model fit in some ubiquitous taxa such as *Amphissa columbiana* ( $R^2 = 0.05$ , Appendix  
488 1: Table S2). The poor model fit may suggest that these taxa either 1) persist at several meadows  
489 even if local environmental conditions are not optimal, due to sufficient immigration, or 2) have  
490 broader environmental niches, and thus the environmental gradient observed across the study  
491 region is not sufficient to observe clear responses (lower or higher abundances) in these taxa.

492

### 493 *Regional species abundance patterns suggest weak environmental filtering*

494 We found that differences in local-scale environmental factors account for some  
495 differences in invertebrate presence and abundance (H2), however there remains a great degree  
496 of unexplained variation given the imperfect model fit (mean  $R^2 = 0.27$ ). Abiotic environmental  
497 variables had a greater influence on invertebrate distribution and abundance than biotic variables  
498 (Fig. 2a). The estimated  $\beta$  parameters suggest that, generally speaking, environments that are  
499 saltier, have a higher seagrass surface area, smaller annual temperature range, and higher  
500 dissolved oxygen levels have higher abundances of many taxa in this study (Fig. 2b). However,  
501 there were several exceptions to this trend, highlighting the importance of understanding  
502 individual species responses to the environment as opposed to the community as a whole.  
503 Overall, we conclude that, at least in taxa for whom the model that had a higher fit (e.g.  
504 *Leptochelia* sp.,  $R^2 = 0.52$ ), environmental filtering influences regional patterns in abundance  
505 and distribution.

506 Differences in environmental conditions may influence distribution and abundance across  
507 the region in one of three ways. First, abiotic variables such as temperature and nutrient  
508 availability may influence food availability through primary productivity. This is possible despite  
509 the fact that biometric variables (seagrass LAI, biomass) explained a relatively low proportion of



510 variance in abundance; while these measurements were taken at a single time point during field  
511 sampling, the abiotic variables represented annual averages (Assis et al. 2018) and therefore  
512 better represent long-term productivity. Second, temperature and salinity may affect species'  
513 abundances via environmental tolerance ranges; for example, the isopod *Idotea baltica* (a  
514 relative of *P. resecata* and *P. montereyensis* in our study) experiences significantly lower  
515 survival in prolonged exposure to higher temperatures and lower salinities than those in their  
516 home habitat (Rugiu et al. 2018). Third, temperature may influence invertebrate metabolic  
517 demands, thereby influencing consumption rates and available primary biomass (O'Connor  
518 2009). Reduced food availability may increase competition, thus altering the number of  
519 individuals a seagrass patch can host.

520         Environmental conditions in temperate seagrass meadows fluctuate seasonally, driving  
521 changes in epifaunal community structure throughout the year (Nelson et al. 1979, Wlodarska-  
522 Kowalczyk et al. 2014, Whippo et al. 2018). Sampling meadows several times within a year to  
523 capture these temporal changes would clarify the importance of the environment if invertebrate  
524 assemblages shift with changes in environmental variables following the linear relationships  
525 uncovered in our analysis.

526

527 *Species co-occurrence patterns may suggest the importance of interspecific interactions*

528         We did not observe strong between-region co-occurrence patterns, suggesting that there  
529 do not appear to be clear regional assemblages corresponding with the five subregions in our  
530 analysis (Figs. 3c, black symbols in 3d). We also did not observe strong co-occurrence patterns  
531 between quadrats, however we did observe strong co-occurrence patterns at the meadow-level  
532 spatial scale. The explanation is that meadows had distinct assemblages, and these assemblages

533 tended to be homogenized within meadows; if two taxa co-occurred in a given meadow (Fig.  
534 3b), then they likely co-occurred in all quadrats within the meadow (Fig. 3a). This is consistent  
535 with previous findings that epifaunal diversity patterns do not differ from random patterns within  
536 meadows (between quadrats) (Whippo et al. 2018).

537         At the meadow-level, two main co-occurrence groupings showed antagonistic abundance  
538 patterns across meadows that could not be explained by spatial structure or shared responses to  
539 the environment (Fig. 3d). These co-occurrence groups have not, to our knowledge, been  
540 explicitly documented before in this region. While there are multiple possible explanations for  
541 non-random species co-occurrence patterns (Connor and Simberloff 1979), we ruled out distance  
542 between meadows and measured environmental variables, because co-occurrence values were  
543 extracted from residual variation unexplained by the environment or space (Ovaskainen et al.  
544 2017). This residual variation therefore likely can be explained by a combination of unmeasured  
545 environmental variables, stochasticity, and biotic interactions.

546         Several interaction types may influence abundance and diversity. The majority of species  
547 in our survey are herbivores or detritivores, and thus may compete for primary (mostly epiphytic  
548 algae) biomass. Laboratory experiments have shown that grazing rate and habitat selection in  
549 amphipods are altered in the presence of morphologically and functionally similar interspecific  
550 competitors (Howard 1985, Brooks and Bell 2001, Beermann et al. 2018). Other species in our  
551 study are suspension feeders, and thus may not compete for food but possibly predator-free space  
552 or substrate on eelgrass blades.

553         The invertebrate assemblage at a given meadow may have multiple possible  
554 compositional states depending on the arrival order of species; this phenomenon is known as  
555 priority effects (Fukami et al. 2016, Ke and Letten 2018) and has been documented in marine

556 fouling communities (Vieira et al. 2018). The antagonistic co-occurrence groupings in our  
557 analysis could suggest priority effects at the meadow-level. It is possible that, following seasonal  
558 declines in abundance or a disturbance event, the first few populations to increase in abundance  
559 or colonize a meadow determine the success of others. Abundance patterns in the sessile  
560 calcifying polychaete *Spirorbis* sp. might demonstrate an example of priority effects. *Spirorbis*  
561 sp. dominated the HL meadow on Haida Gwaii; there were approximately 16 300 individuals,  
562 several orders of magnitude higher than its abundance elsewhere. Meadow HL also had the  
563 lowest taxonomic richness of all 17 meadows (9 species), and we observed fewer micro and  
564 macro-epiphytes on eelgrass blades. Instead, the eelgrass was completely covered with *Spirorbis*  
565 sp. This phenomenon has also been observed in *Z. marina* meadows in Akkeshi-Ko estuary,  
566 Japan (Clark et al. 2018) and in *Thalassia testudinum* meadows in the Northwestern Gulf of  
567 Mexico (Dirnberger 1990). Experimental evidence suggests that *Spirorbis* spp. larvae tend to  
568 settle lower in the water column on newer seagrass growth, away from epiphytic algae and  
569 previously settled conspecifics (Dirnberger 1990). Settlement rates were determined by  
570 planktonic larval density rather than space availability on seagrass blades (Dirnberger 1990).  
571 Given this, it is possible that *Spirorbis* sp. dominates HL from a combination of density-  
572 dependent processes (high larval recruitment) and environmental conditions (high salinity, low  
573 nitrates). The low epiphyte load on seagrass at HL, whether mostly driven by high *Spirorbis* sp.  
574 densities or by the environment, may explain the low abundance and diversity of all other  
575 invertebrate taxa. Overall, the importance of priority effects likely depends on the age,  
576 colonization history, and disturbance regime of seagrass meadows.

577         Negative co-occurrence patterns in taxonomic distributions could also reflect the higher  
578 abundance of predators at some meadows. Field experiments have shown that changes in

579 predation pressure by fish, shorebirds, and predatory invertebrates can shift seagrass-associated  
580 epifaunal assemblages in a matter of weeks (Amundrud et al. 2015; Huang et al. 2015). Previous  
581 studies involving some of the meadows in this analysis (Haida Gwaii, Clayoquot Sound, and  
582 Barkley Sound) found high variation (beta diversity) in fish assemblages among meadows  
583 (Robinson et al. 2011, Iacarella et al. 2018). A comprehensive survey of fish and bird predators  
584 is required to determine the extent to which top-down trophic interactions structure these  
585 invertebrate communities. Positive co-occurrence patterns may additionally be a result of  
586 positive biotic interactions. An example is *Orchomenella recondita* - a gammarid amphipod that  
587 lives in the gastrovascular cavity of the anemone *Anthopleura elegans* (Carlton 2007). This  
588 species was only recorded at the SS meadow, and specifically only found in quadrats where *A.*  
589 *elegans* was collected with the seagrass shoots.

590 While inferences from data taken at a single time point have limitations, our JDSM  
591 approach suggests that there is more to learn about species interactions and the interplay between  
592 interactions and dispersal in structuring these communities. The hypothesized processes driving  
593 seagrass epifaunal diversity patterns that can be further tested with experiments to test for  
594 priority effects or trophic interactions, with population genetics to test for demographic  
595 connectivity, or with particle tracking models (e.g. Treml et al. 2008) to estimate dispersal  
596 velocity.

597

## 598 **Conclusion**

599 Seagrasses are important coastal foundation species, valued throughout the world for  
600 supporting diverse and productive food webs (Constanza et al. 1997, Williams and Heck 2001).  
601 The extent of these ecosystems is declining at rates believed to exceed those of coral reef and

602 rainforest habitat loss, suggesting major losses of associated biodiversity (Waycott et al. 2009).  
603 Our finding that several seagrass-associated faunal taxa across functional groups are consistently  
604 present across a fairly large spatial scale is consistent with notion that “the mobile, fast-  
605 reproducing, and generally omnipresent animal community is keenly responsive to the presence  
606 of habitat” (Lefcheck et al. 2016). Our study suggests that the management of seagrass for its  
607 ecosystem services may be more effective if both local and regional processes are considered  
608 explicitly in habitat protection plans (Economio 2011).

609

#### 610 **Literature Cited**

- 611 Aivelo, T. and Norberg, A. 2018. Parasite-microbiota interactions potentially affect intestinal  
612 communities in wild mammals. *J. Anim. Ecol.* 18:438-447.
- 613 Amundrud, S. L. et al. 2015. Indirect effects of predators control herbivore richness and  
614 abundance in a benthic eelgrass (*Zostera marina*) mesograzers community. – *J. Anim. Biol.*  
615 84: 1092–1102.
- 616 Assis, J. et al. 2018. Bio-ORACLE v2.0: Extending marine data layers for bioclimatic modelling.  
617 – *Global Ecol. Biogeogr.* 27:277–284.
- 618 Beermann, J. et al. 2018. Combined effects of predator cues and competition define habitat  
619 choice and food consumption of amphipod mesograzers. - *Oecologia* 186:645–654.
- 620 Best, R., and Stachowicz, J. J. 2014. Phenotypic and phylogenetic evidence for the role of food  
621 and habitat in the assembly of communities of marine amphipods. - *Ecolog.* 95: 775-786.
- 622 Berlow, E. L. 1999. Strong effects of weak interactions in ecological communities. - *Nature* 398:  
623 330–334.

- 624 Boström, C. et al. 2006. Seagrass landscapes and their effects on associated fauna: A review. -  
625 Estuarine, Coastal Shelf Sci. 68: 383-403.
- 626 Boström, C. et al. 2010. Invertebrate dispersal and habitat heterogeneity: Expression of  
627 biological traits in a seagrass landscape. J. Exp. Mar. Biol. Ecol. 390:106-117.
- 628 Bray, J. R. and J. T. Curtis. 1957. An ordination of upland forest communities of southern  
629 Wisconsin. – Ecol. Monogr. 27:325-349.
- 630 Brooks R.A., and Bell S.S. 2001. Mobile corridors in marine landscapes: Enhancement of faunal  
631 exchange at seagrass/sand ecotones. 2001. – J. Exp. Mar. Bio. Ecol. 264: 67–84.
- 632 Brown, B. L. et al. 2017. Making sense of metacommunities: dispelling the mythology of a  
633 metacommunity typology. - Oecologia 183:643–652.
- 634 Carlton, J. 2007. The Light and Smith Manual: Intertidal invertebrates from Southern California  
635 to Oregon. Fourth edition. University of California Press, Oakland, California, USA.
- 636 Cébrian, J. and Duarte, C. M. 1998. Patterns in leaf herbivory on seagrasses. – Aquat. Bot.  
637 60:67–82.
- 638 Connor, E. F. and Simberloff, D. 1979. The assembly of species communities: Chance or  
639 competition? - Ecology 60:1132–1140.
- 640 Costanza, R., et al. 1997. The value of the world’s ecosystem services and natural capital. -  
641 Nature 387:253–260.
- 642 Cottenie, K. 2005. Integrating environmental and spatial processes in ecological community  
643 dynamics. – Ecol. Lett. 8:1175–1182.
- 644 Duffy J. E. et al. 2015. Biodiversity mediates top-down control in eelgrass ecosystems: A global  
645 comparative-experimental approach. – Ecol. Lett. 18:696–705.

- 646 Economo, E. P. 2011. Biodiversity conservation in metacommunity networks: Linking pattern  
647 and persistence. – Amer. Nat. 177:167-180.
- 648 Fukami, T. et al. 2016. A framework for priority effects. – J. Veg. Sci. 27:655–657.
- 649 Gaines, S. and Roughgarden, J. 1985. Larval settlement rate: A leading determinant of structure  
650 in an ecological community of the marine intertidal zone. – Proc. Natl. Acad. Sci.  
651 82:3707–3711.
- 652 Gilbert, B. and Bennett, J. R. 2010. Partitioning variation in ecological communities: do the  
653 numbers add up? – J. Appl. Ecol. 47:1071–1082.
- 654 Guillaume Blanchet, F. et al. 2018. HMSC: Hierarchical Modelling of Species Community. R  
655 package version. 2.1-2.
- 656 Gullström, M. et al. 2012. Spatial patterns and environmental correlates in leaf-associated  
657 epifaunal assemblages of temperate seagrass (*Zostera marina*) meadows. – Mar. Biol.  
658 159:413–425.
- 659 Huang, A. C. et al. 2015. Top-down control by great blue herons *Ardea herodias* regulates  
660 seagrass-associated epifauna. - Oikos 124:1492–1501.
- 661 Howard, R. K. 1985. Measurements of short-term turnover of epifauna within seagrass beds  
662 using an in situ staining method. – Mar. Ecol. Prog. Ser. 22: 163–168.
- 663 Ke, P. J. and Letten, A. D. 2018. Coexistence theory and the frequency-dependence of priority  
664 effects. – Nat. Ecol. Evol. 2:1691–1695.1–7.
- 665 Kinlan, B. P. and Gaines, S. D. 2003. Propagule dispersal in marine and terrestrial environments:  
666 A community perspective. - Ecology 84:2007–2020.
- 667 Kozloff, E. 1996. Marine Invertebrates of the Pacific Northwest. University of Washington  
668 Press, Seattle, Washington, USA.

- 669 Leibold, M. A. et al. 2004. The metacommunity concept: A framework for multi-scale  
670 community ecology. – *Ecol. Lett.* 7:601–613.
- 671 Leibold, M. A. and Chase, J. M. 2017. *Metacommunity Ecology*, Volume 59. Princeton  
672 University Press, Princeton, New Jersey, USA.
- 673 Lefcheck, J. S. et al. 2016. Faunal Communities Are Invariant to Fragmentation in Experimental  
674 Seagrass Landscapes. - *PLoS ONE* 11(5): e0156550.
- 675 Levin, S. A. and Paine, R. T. 1974. Disturbance, patch formation, and community structure. –  
676 *Proc. Natl. Acad. Sci.* 71:2744–2747.
- 677 Logue, J. et al. 2011. Empirical approaches to metacommunities: a review and comparison with  
678 theory. – *Trends Ecol. Evol.* 26:482–491.
- 679 Mitarai, S. D. et al. 2008. A numerical study of stochastic larval settlement in the California  
680 Current system. – *J. Marine Syst.* 69:295–309.
- 681 Morlon, H. et al. 2008. A general framework for the distance-decay of similarity in ecological  
682 communities. - *Ecol. Lett.* 11:904-917.
- 683 Mouquet, N. and Loreau, M. 2003. Community patterns in source-sink metacommunities. –  
684 *Amer. Nat.* 162:554–557.
- 685 Nelson, W. G. 1979. An analysis of structural pattern in an eelgrass (*Zostera marina* L.)  
686 amphipod community. - *J. exp. Mar. Biol. Ecol.* 39:231-264.
- 687 O’Connor, M. I. 2009. Warming strengthens an herbivore-plant interaction. - *Ecology* 90:388–  
688 398.
- 689 Orth, R. J. et al. 1984. Faunal communities in seagrass beds: A review of the influence of plant  
690 structure and prey characteristics on predator-prey relationships. - *Estuaries* 7:339–350.



- 691 Ovaskainen, O. et al. 2016a. Uncovering hidden spatial structure in species communities with  
692 spatially explicit joint species distribution models. - *Methods Ecol. Evol.* 7:428–436.
- 693 Ovaskainen, O. et al. 2016b. Using latent variable models to identify large networks of species-  
694 to-species associations at different spatial scales. - *Methods Ecol. Evol.* 7:549–555.
- 695 Ovaskainen, O. et al. 2017. How to make more out of community data? A conceptual framework  
696 and its implementation as models and software. – *Ecol. Lett.* 20:561–576.
- 697 R Development Core Team. 2014. R: a language and environment for statistical computing. R  
698 Foundation for Statistical Computing. Vienna, Austria. <http://www.R-project.org>.
- 699 Ricklefs, R. E. and Schluter, D. 1993. *Species Diversity in Ecological Communities: Historical*  
700 *and Geographical Perspectives*. University of Chicago Press, Chicago, Illinois, USA.
- 701 Rugiu, L. et al. 2018. Variations in tolerance to climate change in a key littoral herbivore. – *Mar.*  
702 *Biol.* 165:1–11.
- 703 Sala, E. and Graham, M. H. 2002. Community-wide distribution of predator-prey interaction  
704 strength in kelp forests. – *Proc. Natl. Acad. Sci.* 99:3678–3683.
- 705 Sand-Jensen. 1977. Effect of epiphytes on eelgrass photosynthesis. – *Aquat. Bot.* 3:55-63.
- 706 Schmid, A. and Wilson, M. V. 1985. Biological determinants of species diversity. – *J.*  
707 *Biogeogr.* 12:1–20.
- 708 Stier, A. C. et al. 2019. Temporal variation in dispersal modifies dispersal-diversity relationships  
709 in an experimental seagrass metacommunity. – *Mar. Ecol. Prog. Ser.* 613:67-76.
- 710 Thom, R. et al. 1995. Temporal patterns of grazers and vegetation in a temperate seagrass  
711 system. – *Aquat. Bot.* 50:201–205.
- 712 Thompson, P. L. et al. 2017. Loss of habitat and connectivity erodes species diversity, ecosystem  
713 functioning, and stability in metacommunity networks. - *Ecography* 40:98–108.

- 714 Thompson, P. L. et al. 2020. A process-based metacommunity framework linking local and  
715 regional scale community ecology. –Ecol. Lett. (In press)
- 716 Treml, E. A. et al. 2008. Modeling population connectivity by ocean currents: a graph-theoretic  
717 approach for marine conservation. – Landsc. Ecol. 23:19–36.
- 718 Tuomisto, H. et al. 2012. Modelling niche and neutral dynamics: on the ecological interpretation  
719 of variation partitioning. - Ecography 35:961–971.
- 720 Tyberghein, L. et al. 2011. Bio-ORACLE: a global environmental dataset for marine species  
721 distribution modelling. – Glob. Ecol. Biogeogr. 21: 272-281.
- 722 Vieira, E. et al. 2018. Persistence and space preemption explain species-specific founder effects  
723 on the organization of marine sessile communities. - Ecology and Evolution 8:3430–3442.
- 724 Virnstein, R. W., and R. K. Howard. 1987. Motile epifauna of marine macrophytes in the Indian  
725 River Lagoon, Florida. II. Comparisons between drift algae and three species of seagrasses.  
726 Bulletin of Marine Science 41:13–26.
- 727 Vellend, M. 2010. Conceptual synthesis in community ecology. – Q. Rev. Biol. 85:183–206.
- 728 Ward, J. H. 1963. Hierarchical grouping to optimize an objective unction. - Journal of the  
729 American Statistical Association 58:236–244.
- 730 Waycott, M. et al. 2009. Accelerating loss of seagrasses across the globe threatens coastal  
731 ecosystems. – Proc. Natl. Acad. Sci. 106: 12377-12381.
- 732 Wichmann, C. S. et al. 2012. Floating kelps in Patagonian Fjords: An important vehicle for  
733 rafting invertebrates and its relevance for biogeography. – Mar. Biol. 159:2035–2049.

- 734 Williams, S. L., and K. L. Heck, Jr. 2001. Seagrass community ecology. Pages 317–337 in M. D.  
735 Bertness, M. E. Hay, and S. D. Gaines, editors. *Marine community ecology*. Sinauer  
736 Associates, Sunderland, Massachusetts, USA.
- 737 Whalen, M. A., et al. 2013. Temporal shifts in top-down vs. bottom-up control of epiphytic algae  
738 in a seagrass ecosystem. - *Ecology* 94:510-520.
- 739 Whippo, R. et al. 2018. Epifaunal diversity patterns within and among seagrass meadows suggest  
740 landscape-scale biodiversity processes. - *Ecosphere* 9:02490.10.1002/ecs2.2490.
- 741 Wlodarska-Kowalczyk, M. et al. 2014. Evidence of season-dependency in vegetation effects on  
742 macrofauna in temperate seagrass meadows (Baltic Sea). - *PLoS One* 9:e100788.
- 743 Yamada et al. 2007. Temporal and spatial macrofaunal community changes along a salinity  
744 gradient in seagrass meadows of Akkeshi-ko estuary and Akkeshi Bay, northern Japan. –  
745 *Hydrobiologia* 592: 345-358.
- 746 Yamada, K. et al. 2014. Environmental and spatial controls of macroinvertebrate functional  
747 assemblages in seagrass ecosystems along the Pacific coast of northern Japan. - *Glob. Ecol.*  
748 *Cons.* 2:47–61.
- 749 Yeager, L. A. et al. 2019. Trait sensitivities to seagrass fragmentation across spatial scales shape  
750 benthic community structure. – *J. Anim. Ecol.* 88:1743-1754.
- 751
- 752
